# Supplementary material for: Pseudotyping Improves the Yield of Functional SARS-CoV-2 Virus-like Particles (VLPs) as Tools for Vaccine and Therapeutic Development
Source: MDPI journal article supplement (doi:10.3390/ijms241914622), 2023-09-27
Supplement: s1 [file s1]

*Article*

# **Pseudotyping Improves the Yield of Functional SARS-CoV-2 Virus-like Particles (VLPs) as Tools for Vaccine and Therapeutic Development**

**Andrew J. Zak, Trang Hoang, Christine M. Yee, Syed M. Rizvi, Ponnandy Prabhu and Fei Wen \***

Department of Chemical Engineering, University of Michigan, Ann Arbor, MI 48109, USA;  
prabhup@umich.edu (P.P.)

\* Correspondence: feiwenum@umich.edu

**Table S1.** Templates and primers used in this study.

| Template            | PCR product       | Primer name | Sequence                                       |
|---------------------|-------------------|-------------|------------------------------------------------|
| A/PR/8/34 H1N1 cDNA | HA                | HA-For      | AATCTAGAATGAAGGCAAACCTACTGGTCC                 |
|                     |                   | HA-Rev      | ACAAGCTTTCAGATGCATATTCTGCACTGC                 |
|                     | M1                | M1-For      | TCCCGGTACCTCACTTGAACCGTTGC                     |
|                     |                   | M1-Rev      | ATCACCCGGGATGAGTCTTCTAACC                      |
| gBlock S            | S                 | S-For       | CGGGCGCGGATCCATGTTTGTGTTCCTTGTTCTTCTTC         |
|                     |                   | S-Rev       | ACTTCTCGACAAGCTTTTAAGTGTAGTGCAGCTTCACGCCCTTCA  |
| gBlock E            | E                 | E-For       | ACCATGGCTCGAGTTACACAAGCAAGTCTGG                |
|                     |                   | E-Rev       | TGATCACCCGGGATGTATTCGTTTGTTCAGAAGAAACA         |
| gBlock M            | M                 | M-For       | ACCATGGCTCGAGTTATTGTACAAGGAGGGCG               |
|                     |                   | M-Rev       | TGATCACCCGGGATGGCTGACTCAAATGGAAC               |
| pFastBac Dual SM    | M cassette        | Mcas-For    | TTGAGCCTAGGGTGGCTATGGCAGGGCTTGC                |
|                     |                   | Mcas-Rev    | GATCTCCTAGGATACGGACCTTTAATTCAACCCACAC          |
| gBlock – S Omicron  | S Omicron         | Om-Rev      | TGTGTAAGCGATAATTGACTGGGACGCTAC                 |
| Template            | Quikchange Primer |             | Sequence                                       |
| pFastBac Dual SHAM1 | K417N-For         |             | GCCCCAGGACAAACAGGTAACATAGCTGACTATAACTAC        |
|                     | K417N-Rev         |             | CTATGTTACCTGTTTGTCTGCTGGGGCAATCTGTCTG          |
|                     | L452R-For         |             | GTGGGAGGCAACTACAACACTACAGATACAGACTTTTAGG       |
|                     | L452R-Rev         |             | CTGTATCTGTAGTTGTAGTTGCCTCCACCTTGCTATC          |
|                     | T478K-For         |             | AAGCCGGTAGCAAGCCATGTAATGGCGTCGAGGG             |
|                     | T478K-Rev         |             | CGCCATTACATGGCTTGCTACCGGCTTGATAGATTCCG         |
|                     | E484K-For         |             | AATGGCGTCAAGGGATTAAATTGTTATTTCCCGTTGCAATCATAAC |
|                     | E484K-Rev         |             | AATTAAATCCCTTGACGCCATTACATGGCGTGCTACCG         |
|                     | N501Y-For         |             | TTTCAGCCGACGTACGGCGTTGGTTATCAACCG              |
|                     | N501Y-Rev         |             | ATAACCAACGCCGTACGTCGGCTGAAAGCCGTTGATTGC        |

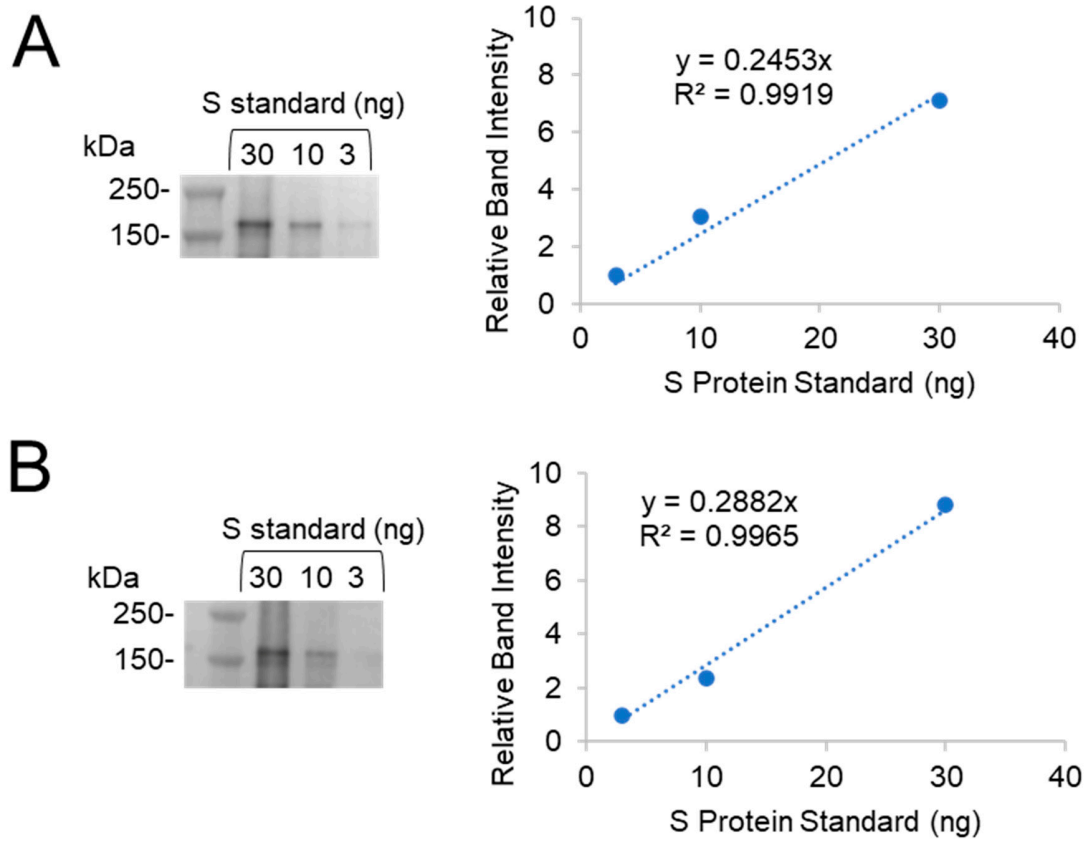

**Figure S1.** Standard curves for Western blot quantification of S protein in SE, SM, SEM and WT SHAM1 (A) VLPs and (B) cell lysates.

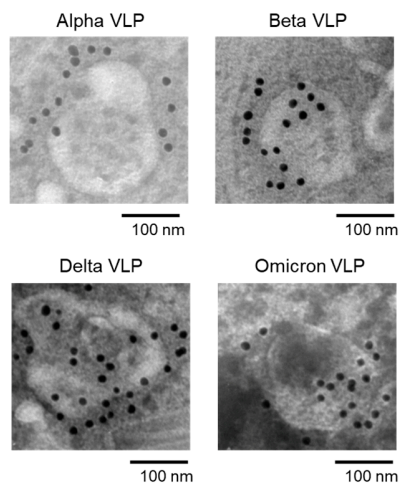

**Figure S2.** Representative TEM images of pseudotyped variant VLPs in the 150-200 nm size range. Immunogold-labeling was performed using anti-S2.

A

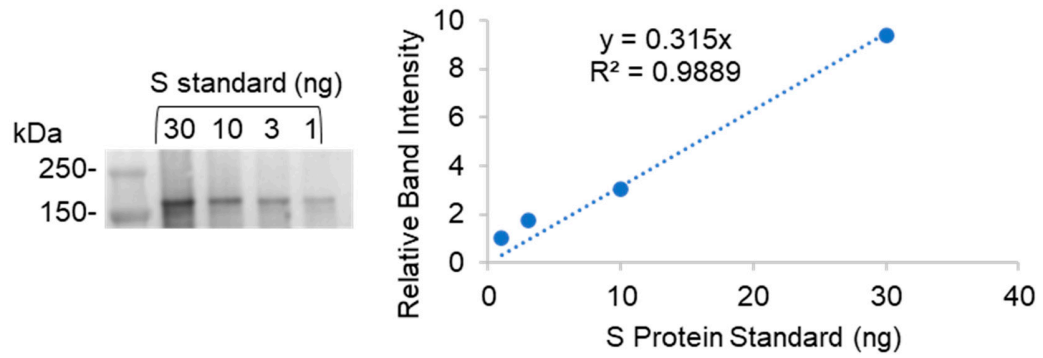

B

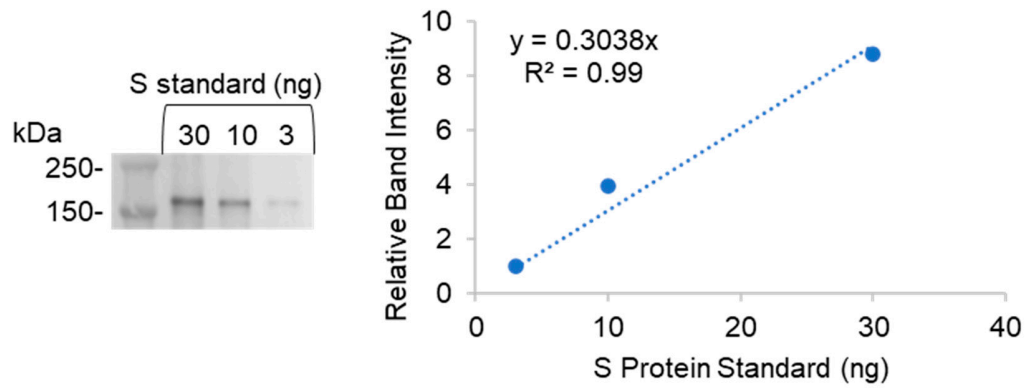

**Figure S3.** Standard curves for Western blot quantification of S protein in pseudotyped variant (A) VLPs and (B) cell lysates using anti-S2.

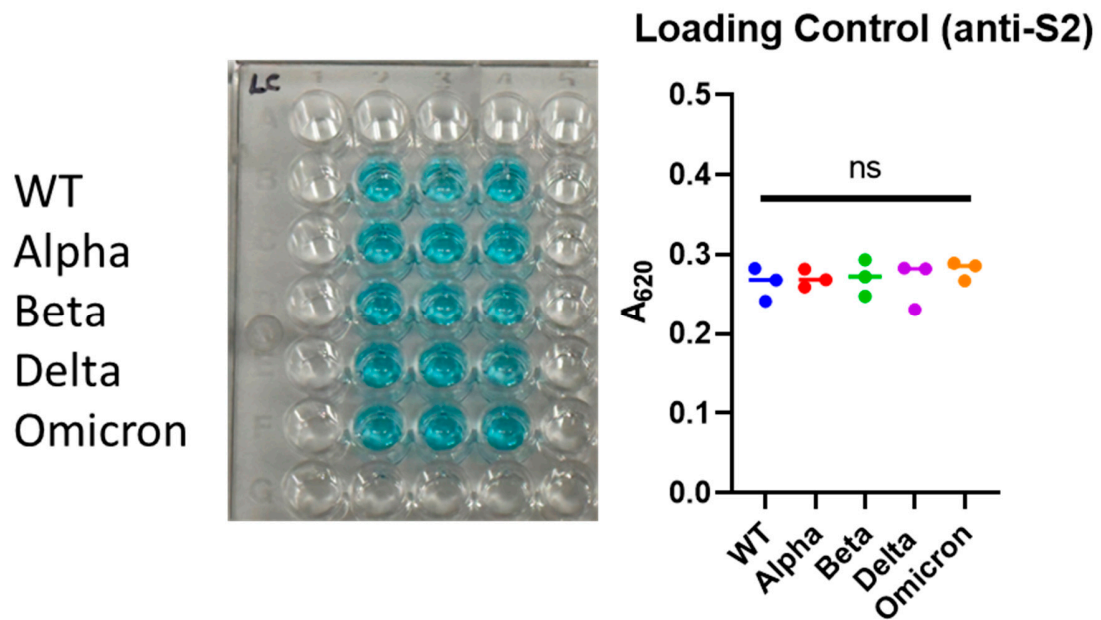

**Figure S4.** Loading controls to ensure same quantity of S variant VLPs are captured on the plate.

Data represent mean  $\pm$  SE ( $n = 3$ , unpaired Student's  $t$  test, all  $p > 0.05$ , not significant).
